# Supplementary material
Source: MDPI journal article supplement (https://www.mdpi.com/2254-9625/12/5/35)
Supplement: s1 [file s1]

## Supplemental Materials

### A) Descriptives for each item

| Item    | <i>M</i> | <i>SD</i> |
|---------|----------|-----------|
| Item 1  | 3.80     | .97       |
| Item 2  | 4.19     | 1.07      |
| Item 3  | 4.51     | .79       |
| Item 4  | 4.30     | .88       |
| Item 5  | 4.14     | 1.05      |
| Item 6  | 3.81     | 1.07      |
| Item 7  | 4.21     | .85       |
| Item 8  | 4.71     | .64       |
| Item 9  | 3.88     | 1.09      |
| Item 10 | 4.11     | .95       |
| Item 11 | 4.00     | .95       |
| Item 12 | 4.26     | .84       |
| Item 13 | 4.22     | .86       |
| Item 14 | 4.34     | .94       |
| Item 15 | 4.42     | .88       |
| Item 16 | 4.35     | .82       |
| Item 17 | 4.26     | .96       |
| Item 18 | 4.59     | .73       |
| Item 19 | 4.36     | .91       |
| Item 20 | 4.21     | .90       |

### B) Frequency distribution of each item

Item 1

|      | <i>f</i> | <i>f</i> % | <i>fc</i> |
|------|----------|------------|-----------|
| 1    | 4        | 1.5        | 1.5       |
| 2    | 20       | 7.5        | 9.0       |
| 3    | 73       | 27.4       | 36.5      |
| 4    | 97       | 36.5       | 72.9      |
| 5    | 72       | 27.1       | 100       |
| Tot. | 266      | 100        |           |

Item 2

|      | <i>f</i> | <i>f</i> % | <i>fc</i> |
|------|----------|------------|-----------|
| 1    | 6        | 2.3        | 2.3       |
| 2    | 20       | 7.5        | 9.8       |
| 3    | 37       | 13.9       | 23.7      |
| 4    | 58       | 21.8       | 45.5      |
| 5    | 145      | 54.5       | 100       |
| Tot. | 266      | 100        |           |

Item 3

|      | <i>f</i> | <i>f</i> % | <i>fc</i> |
|------|----------|------------|-----------|
| 1    | 1        | .4         | .4        |
| 2    | 8        | 3.0        | 3.4       |
| 3    | 20       | 7.5        | 10.9      |
| 4    | 62       | 23.3       | 34.2      |
| 5    | 165      | 65.8       | 100       |
| Tot. | 266      | 100        |           |

Item 4

|      | <i>f</i> | <i>f</i> % | <i>fc</i> |
|------|----------|------------|-----------|
| 1    | 2        | .8         | .8        |
| 2    | 9        | 3.4        | 4.1       |
| 3    | 36       | 13.5       | 17.7      |
| 4    | 79       | 29.7       | 47.4      |
| 5    | 140      | 52.6       | 100       |
| Tot. | 266      | 100        |           |

Item 5

|      | <i>f</i> | <i>f</i> % | <i>fc</i> |
|------|----------|------------|-----------|
| 1    | 8        | 3.0        | 3.0       |
| 2    | 18       | 6.8        | 9.8       |
| 3    | 27       | 10.2       | 19.9      |
| 4    | 88       | 33.1       | 53.0      |
| 5    | 125      | 47.0       | 100       |
| Tot. | 266      | 100        |           |

Item 6

|      | <i>f</i> | <i>f</i> % | <i>fc</i> |
|------|----------|------------|-----------|
| 1    | 7        | 2.6        | 2.6       |
| 2    | 27       | 10.2       | 12.8      |
| 3    | 58       | 21.8       | 34.6      |
| 4    | 91       | 34.2       | 68.8      |
| 5    | 83       | 31.2       | 100       |
| Tot. | 266      | 100        |           |

## Item 7

|      | <i>f</i> | <i>f</i> % | <i>fc</i> |
|------|----------|------------|-----------|
| 1    | 2        | .8         | .8        |
| 2    | 7        | 2.6        | 3.4       |
| 3    | 40       | 15.0       | 18.4      |
| 4    | 102      | 38.3       | 56.8      |
| 5    | 115      | 43.2       | 100       |
| Tot. | 266      | 100        |           |

## Item 8

|      | <i>f</i> | <i>f</i> % | <i>fc</i> |
|------|----------|------------|-----------|
| 1    | 2        | .8         | .8        |
| 2    | 2        | .8         | 1.5       |
| 3    | 9        | 3.4        | 4.9       |
| 4    | 44       | 16.5       | 21.5      |
| 5    | 209      | 78.6       | 100       |
| Tot. | 266      | 100        |           |

## Item 9

|      | <i>f</i> | <i>f</i> % | <i>fc</i> |
|------|----------|------------|-----------|
| 1    | 7        | 2.6        | 2.6       |
| 2    | 28       | 10.5       | 13.2      |
| 3    | 49       | 18.4       | 31.6      |
| 4    | 89       | 33.5       | 65.0      |
| 5    | 93       | 35.0       | 100       |
| Tot. | 266      | 100        |           |

## Item 10

|      | <i>f</i> | <i>f</i> % | <i>fc</i> |
|------|----------|------------|-----------|
| 1    | 2        | .8         | .8        |
| 2    | 15       | 5.6        | 6.4       |
| 3    | 51       | 19.2       | 25.6      |
| 4    | 83       | 31.2       | 56.8      |
| 5    | 115      | 43.2       | 100       |
| Tot. | 266      | 100        |           |

## Item 11

|      | <i>f</i> | <i>f</i> % | <i>fc</i> |
|------|----------|------------|-----------|
| 1    | 4        | 1.5        | 1.5       |
| 2    | 13       | 4.9        | 6.4       |
| 3    | 57       | 21.4       | 27.8      |
| 4    | 98       | 36.8       | 64.7      |
| 5    | 94       | 35.3       | 100       |
| Tot. | 266      | 100        |           |

Item 12

|      | <i>f</i> | <i>f</i> % | <i>fc</i> |
|------|----------|------------|-----------|
| 1    | 1        | .4         | .4        |
| 2    | 9        | 3.4        | 3.8       |
| 3    | 34       | 12.8       | 16.5      |
| 4    | 99       | 37.2       | 53.8      |
| 5    | 123      | 46.2       | 100       |
| Tot. | 266      | 100        |           |

Item 13

|      | <i>f</i> | <i>f</i> % | <i>fc</i> |
|------|----------|------------|-----------|
| 1    | 1        | .4         | .4        |
| 2    | 11       | 4.1        | 4.5       |
| 3    | 35       | 13.2       | 17.7      |
| 4    | 100      | 37.6       | 55.3      |
| 5    | 119      | 44.7       | 100       |
| Tot. | 266      | 100        |           |

Item 14

|      | <i>f</i> | <i>f</i> % | <i>fc</i> |
|------|----------|------------|-----------|
| 1    | 4        | 1.5        | 1.5       |
| 2    | 12       | 4.5        | 6.0       |
| 3    | 27       | 10.2       | 16.2      |
| 4    | 70       | 26.3       | 42.5      |
| 5    | 153      | 57.5       | 100       |
| Tot. | 266      | 100        |           |

Item 15

|      | <i>f</i> | <i>f</i> % | <i>fc</i> |
|------|----------|------------|-----------|
| 1    | 4        | 1.5        | 1.5       |
| 2    | 9        | 3.4        | 4.9       |
| 3    | 18       | 6.8        | 11.7      |
| 4    | 74       | 27.8       | 39.5      |
| 5    | 161      | 60.5       | 100       |
| Tot. | 266      | 100        |           |

Item 16

|      | <i>f</i> | <i>f</i> % | <i>fc</i> |
|------|----------|------------|-----------|
| 1    | 1        | .4         | .4        |
| 2    | 8        | 3.0        | 3.4       |
| 3    | 29       | 10.9       | 14.3      |
| 4    | 87       | 32.7       | 47.0      |
| 5    | 141      | 53.0       | 100       |
| Tot. | 266      | 100        |           |

Item 17

|      | <i>f</i> | <i>f</i> % | <i>fc</i> |
|------|----------|------------|-----------|
| 1    | 5        | 1.9        | 1.9       |
| 2    | 11       | 4.1        | 6.0       |
| 3    | 34       | 12.8       | 18.8      |
| 4    | 76       | 28.6       | 47.4      |
| 5    | 140      | 52.6       | 100       |
| Tot. | 266      | 100        |           |

Item 18

|      | <i>f</i> | <i>f</i> % | <i>fc</i> |
|------|----------|------------|-----------|
| 1    | 2        | .8         | .8        |
| 2    | 2        | .8         | 1.5       |
| 3    | 20       | 7.5        | 9.0       |
| 4    | 54       | 20.3       | 29.3      |
| 5    | 188      | 70.7       | 100       |
| Tot. | 266      | 100        |           |

Item 19

|      | <i>f</i> | <i>f</i> % | <i>fc</i> |
|------|----------|------------|-----------|
| 1    | 5        | 1.9        | 1.9       |
| 2    | 5        | 1.9        | 3.8       |
| 3    | 34       | 12.8       | 16.5      |
| 4    | 66       | 24.8       | 41.4      |
| 5    | 156      | 58.6       | 100       |
| Tot. | 266      | 100        |           |

Item 20

|      | <i>f</i> | <i>f</i> % | <i>fc</i> |
|------|----------|------------|-----------|
| 1    | 2        | .8         | .8        |
| 2    | 11       | 4.1        | 4.9       |
| 3    | 41       | 15.4       | 20.3      |
| 4    | 87       | 32.7       | 53.0      |
| 5    | 125      | 47.0       | 100       |
| Tot. | 266      | 100        |           |

\* Response rate from 1 "No difficulty" to 5 "Extreme difficulty"

### C) Correlation matrix

|         | Item 1 | Item 2 | Item 3 | Item 4 | Item 5 | Item 6 | Item 7 | Item 8 | Item 9 | Item 10 | Item 11 | Item 12 | Item 13 | Item 14 | Item 15 | Item 16 | Item 17 | Item 18 | Item 19 | Item 20 |
|---------|--------|--------|--------|--------|--------|--------|--------|--------|--------|---------|---------|---------|---------|---------|---------|---------|---------|---------|---------|---------|
| Item 1  | -      |        |        |        |        |        |        |        |        |         |         |         |         |         |         |         |         |         |         |         |
| Item 2  | .29**  | -      |        |        |        |        |        |        |        |         |         |         |         |         |         |         |         |         |         |         |
| Item 3  | .31**  | .26**  | -      |        |        |        |        |        |        |         |         |         |         |         |         |         |         |         |         |         |
| Item 4  | .31**  | .27**  | .56**  | -      |        |        |        |        |        |         |         |         |         |         |         |         |         |         |         |         |
| Item 5  | .25**  | .22**  | .34**  | .34**  | -      |        |        |        |        |         |         |         |         |         |         |         |         |         |         |         |
| Item 6  | .23**  | .22**  | .36**  | .40**  | .43**  | -      |        |        |        |         |         |         |         |         |         |         |         |         |         |         |
| Item 7  | .40**  | .10    | .31**  | .45**  | .27**  | .39**  | -      |        |        |         |         |         |         |         |         |         |         |         |         |         |
| Item 8  | .35**  | .10    | .43**  | .31**  | .28**  | .26**  | .26**  | -      |        |         |         |         |         |         |         |         |         |         |         |         |
| Item 9  | .34**  | .29**  | .16*   | .36*   | .20**  | .25**  | .39**  | .21**  | -      |         |         |         |         |         |         |         |         |         |         |         |
| Item 10 | .28**  | .19**  | .22**  | .29**  | .27**  | .30**  | .30**  | .31**  | .38**  | -       |         |         |         |         |         |         |         |         |         |         |
| Item 11 | .47**  | .12    | .31**  | .43**  | .21**  | -.22** | .43**  | .25**  | .42**  | .37**   | -       |         |         |         |         |         |         |         |         |         |
| Item 12 | .34**  | .12    | .30*   | .42**  | .20**  | .16*   | .39**  | .22**  | .39**  | .18**   | .57**   | -       |         |         |         |         |         |         |         |         |
| Item 13 | .35**  | .14*   | .33**  | .43**  | .25**  | .24**  | .37**  | .19**  | .45**  | .25**   | .52**   | .67**   | -       |         |         |         |         |         |         |         |
| Item 14 | .29**  | .08    | .28**  | .35**  | .25**  | .18**  | .29**  | .23**  | .37**  | .18**   | .42**   | .47**   | .47**   | -       |         |         |         |         |         |         |
| Item 15 | .44**  | .06    | .37**  | .42**  | .16**  | .18**  | .43**  | .29**  | .33**  | .18**   | .52**   | .54**   | .54**   | .40**   | -       |         |         |         |         |         |
| Item 16 | .39**  | .13*   | .34**  | .44**  | .24**  | .26**  | .42**  | .34**  | .29**  | .26**   | .43**   | .41**   | .42**   | .31**   | .56**   | -       |         |         |         |         |
| Item 17 | .46**  | .15*   | .33**  | .41**  | .18**  | .23**  | .42**  | .27**  | .38**  | .20**   | .49**   | .48**   | .44**   | .32**   | .47**   | .55**   | -       |         |         |         |
| Item 18 | .25**  | .12    | .26**  | .27**  | .26**  | .22**  | .25**  | .33**  | .18**  | .08     | .24**   | .35**   | .26**   | .32**   | .33**   | .33**   | .39**   | -       |         |         |
| Item 19 | .21**  | .16*   | .29**  | .26**  | .22**  | .20**  | .26**  | .25**  | .23**  | .12     | .29**   | .32**   | .29**   | .28**   | .26**   | .29**   | .35**   | .50**   | -       |         |
| Item 20 | .44**  | .17**  | .28**  | .28**  | .33**  | .25**  | .37**  | .29**  | .29**  | .23**   | .37**   | .31**   | .32**   | .29**   | .32**   | .40**   | .52**   | .44**   | .50**   | -       |

\*  $p < .05$ ; \*\*  $p < .01$ .
